# Supplementary material for: Δ8-THC Protects against Amyloid Beta Toxicity Modulating ER Stress In Vitro: A Transcriptomic Analysis
Source: MDPI journal article supplement (doi:10.3390/ijms24076598), 2023-04-02
Supplement: s1 [file s1]

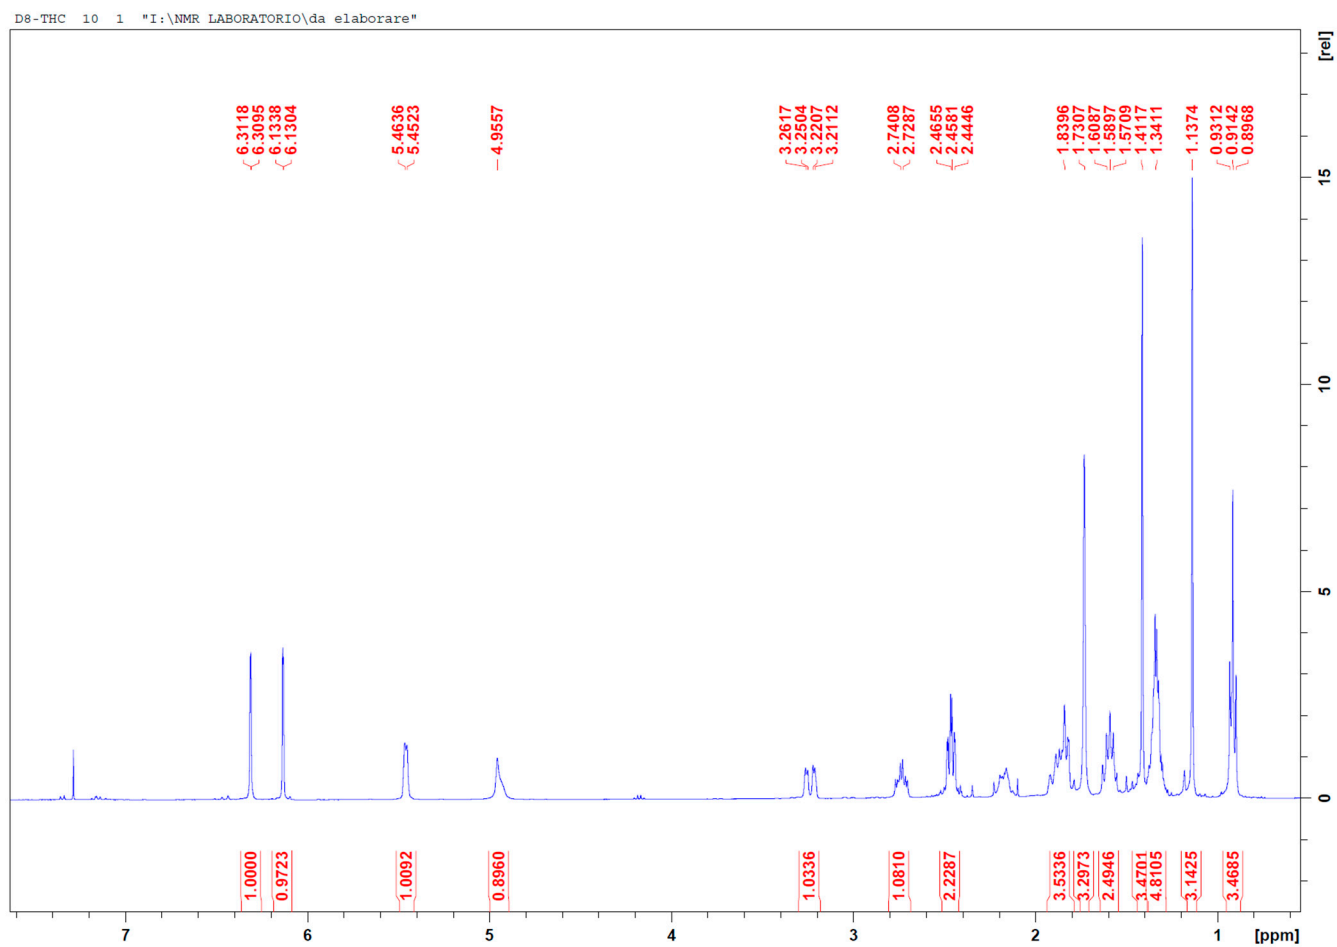

**Figure S1:**  $^1\text{H}$  NMR of  $\Delta^8$ -THC (1) in  $\text{CDCl}_3$ , 400 MHz.

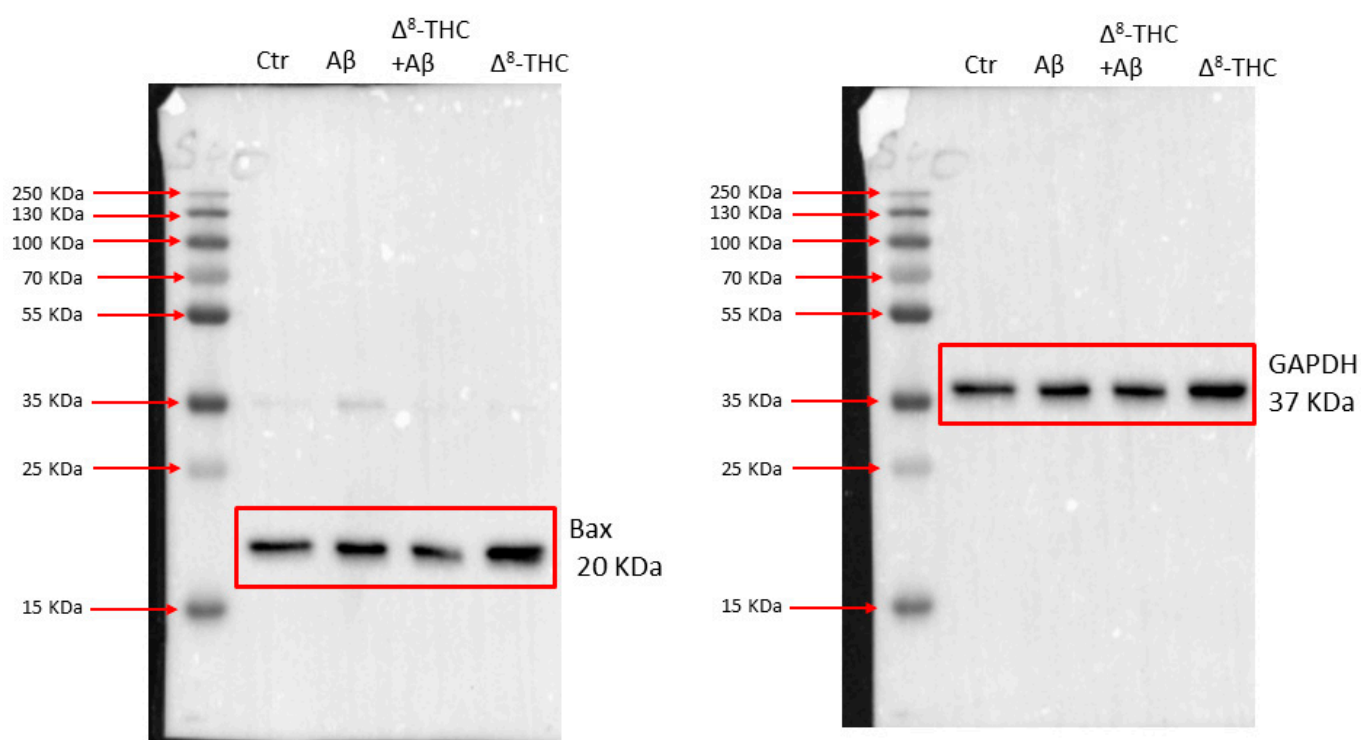

**Figure S2:** Uncropped blots for Bax and GAPDH.

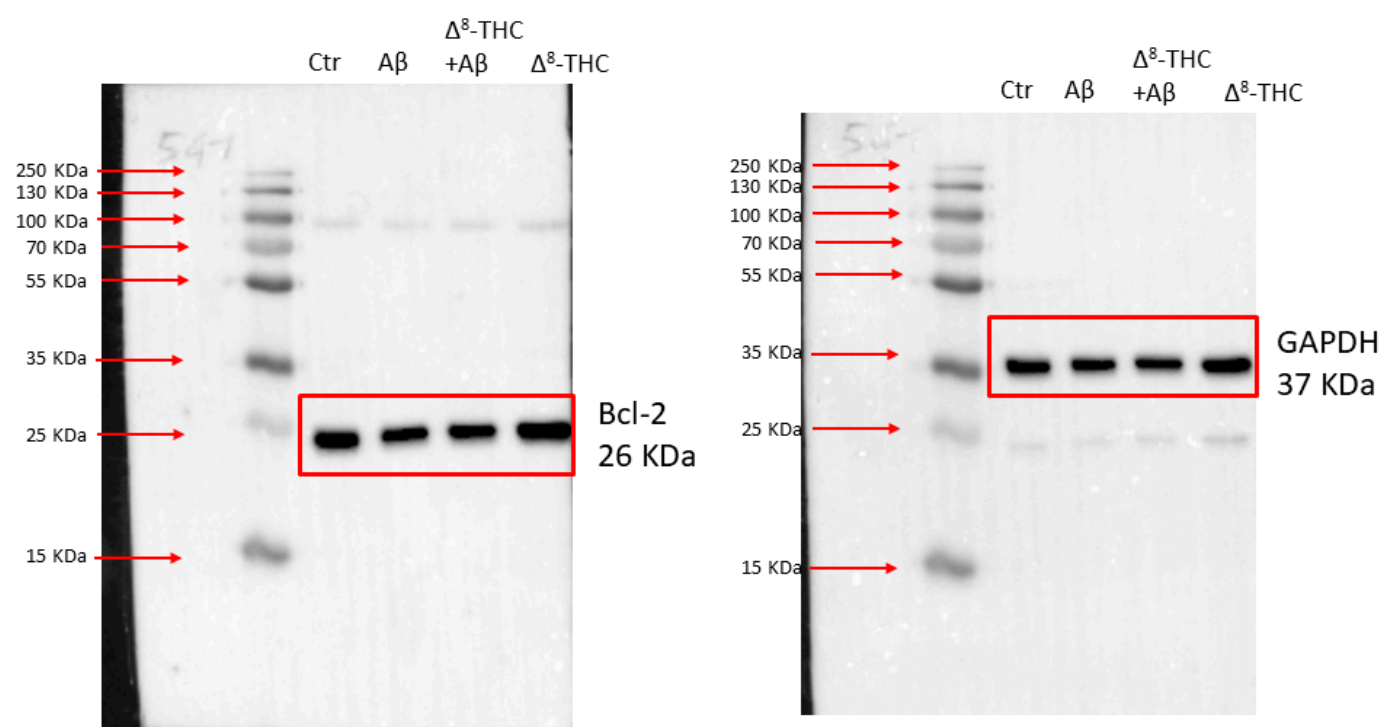

**Figure S3:** uncropped blots for Bcl-2 and GAPDH.

**Table S1.** Inspected DEGs involved in reticulum endoplasmic pathways.

| Gene            | CTRL      | A $\beta$ <sub>1-42</sub> | Fold Change | q-Value                | A $\beta$ <sub>1-42</sub> | $\Delta^8$ -THC + A $\beta$ <sub>1-42</sub> | Fold Change | q-Value                | CTRL      | $\Delta^8$ -THC | Fold Change | q-Value                 |
|-----------------|-----------|---------------------------|-------------|------------------------|---------------------------|---------------------------------------------|-------------|------------------------|-----------|-----------------|-------------|-------------------------|
| <i>ATF6</i>     | 4264.87   | 4617.98                   | 0.11        | $9.70 \times 10^{-07}$ | 5551.85                   | 5127.2                                      | -0.11       | $9.51 \times 10^{-08}$ |           |                 |             |                         |
| <i>ATXN3</i>    |           |                           |             |                        | 2029.33                   | 2262.00                                     | 0.16        | $5.85 \times 10^{-06}$ |           |                 |             |                         |
| <i>BAX</i>      | 383.60    | 446.87                    | 0.22        | $5.92 \times 10^{-03}$ |                           |                                             |             |                        | 410.44    | 489.50          | 0.25        | $1.08 \times 10^{-03}$  |
| <i>BCAP31</i>   | 3644.71   | 3422.1                    | -0.09       | $7.17 \times 10^{-04}$ |                           |                                             |             |                        |           |                 |             |                         |
| <i>BCL2</i>     | 934.12    | 682.07                    | -0.45       | $1.74 \times 10^{-17}$ | 820.00                    | 1032.61                                     | 0.33        | $1.08 \times 10^{-10}$ | 999.50    | 787.94          | -0.34       | $3.16 \times 10^{-11}$  |
| <i>DERL1</i>    |           |                           |             |                        | 1983.66                   | 2227.06                                     | 0.17        | $1.52 \times 10^{-06}$ | 1713.93   | 1955.47         | 0.19        | $2.94 \times 10^{-07}$  |
| <i>DNAJA1</i>   | 12806.77  | 14122.61                  | 0.14        | $9.08 \times 10^{-28}$ |                           |                                             |             |                        | 13703.16  | 15581.19        | 0.19        | $1.29 \times 10^{-50}$  |
| <i>DNAJA2</i>   | 2367.90   | 2190.94                   | -0.11       | $8.15 \times 10^{-04}$ | 2634.00                   | 2823.82                                     | 0.10        | $1.40 \times 10^{-03}$ |           |                 |             |                         |
| <i>DNAJB12</i>  | 1169.58   | 1056.57                   | -0.15       | $2.36 \times 10^{-03}$ |                           |                                             |             |                        | 1251.44   | 1144.71         | -0.13       | $6.89 \times 10^{-03}$  |
| <i>DNAJB2</i>   | 610.21    | 705.59                    | 0.21        | $8.48 \times 10^{-04}$ |                           |                                             |             |                        |           |                 |             |                         |
| <i>DNAJC1</i>   | 557.15    | 644.07                    | 0.21        | $1.51 \times 10^{-03}$ | 774.32                    | 651.93                                      | -0.25       | $3.70 \times 10^{-05}$ |           |                 |             |                         |
| <i>DNAJC10</i>  | 8659.08   | 8985.39                   | 0.05        | $1.83 \times 10^{-03}$ |                           |                                             |             |                        | 9265.16   | 9678.43         | 0.06        | $1.52 \times 10^{-04}$  |
| <i>DNAJC3</i>   | 404.60    | 489.39                    | 0.27        | $3.03 \times 10^{-04}$ |                           |                                             |             |                        |           |                 |             |                         |
| <i>EDEM1</i>    | 1122.04   | 920.88                    | -0.29       | $3.16 \times 10^{-09}$ | 1107.11                   | 1244.10                                     | 0.17        | $4.10 \times 10^{-04}$ |           |                 |             |                         |
| <i>EDEM3</i>    |           |                           |             |                        | 3746.55                   | 3337.83                                     | -0.17       | $1.58 \times 10^{-10}$ |           |                 |             |                         |
| <i>EIF2AK2</i>  | 3973.03   | 4375.55                   | 0.14        | $5.90 \times 10^{-09}$ |                           |                                             |             |                        |           |                 |             |                         |
| <i>EIF2AK3</i>  |           |                           |             |                        | 3202.78                   | 3011.41                                     | -0.09       | $2.58 \times 10^{-03}$ | 2771.39   | 2585.31         | -0.10       | $1.46 \times 10^{-03}$  |
| <i>EIF2AK4</i>  | 5794.83   | 6451.60                   | 0.15        | $1.51 \times 10^{-15}$ | 7756.28                   | 7018.64                                     | -0.14       | $4.64 \times 10^{-16}$ | 6200.43   | 6869.93         | 0.15        | $8.77 \times 10^{-15}$  |
| <i>ERLEC1</i>   | 3181.52   | 3426.62                   | 0.11        | $1.06 \times 10^{-04}$ |                           |                                             |             |                        | 3404.20   | 3700.43         | 0.12        | $7.38 \times 10^{-06}$  |
| <i>ERN1</i>     | 370.33    | 478.53                    | 0.37        | $1.46 \times 10^{-06}$ | 575.30                    | 503.89                                      | -0.19       | $7.29 \times 10^{-03}$ |           |                 |             |                         |
| <i>ERO1A</i>    | 2105.90   | 2326.63                   | 0.14        | $1.79 \times 10^{-05}$ |                           |                                             |             |                        |           |                 |             |                         |
| <i>ERO1B</i>    |           |                           |             |                        | 494.83                    | 379.76                                      | -0.38       | $4.80 \times 10^{-07}$ | 390.34    | 331.41          | -0.24       | $6.41 \times 10^{-03}$  |
| <i>ERP29</i>    |           |                           |             |                        | 2331.67                   | 2516.71                                     | 0.11        | $9.32 \times 10^{-04}$ | 2059.32   | 2229.39         | 0.11        | $1.22 \times 10^{-03}$  |
| <i>FBXO6</i>    | 37.59     | 16.28                     | -1.21       | $2.21 \times 10^{-04}$ | 19.58                     | 56.09                                       | 1.52        | $3.86 \times 10^{-07}$ |           |                 |             |                         |
| <i>HERPUD1</i>  |           |                           |             |                        | 1232.17                   | 1033.53                                     | -0.25       | $5.56 \times 10^{-08}$ |           |                 |             |                         |
| <i>HSP90AA1</i> | 89319.09  | 93064.28                  | 0.06        | $3.31 \times 10^{-33}$ | 111884.22                 | 112946.55                                   | 0.01        | $5.68 \times 10^{-03}$ | 95570.81  | 103369.33       | 0.11        | $3.57 \times 10^{-129}$ |
| <i>HSP90AB1</i> | 123032.36 | 126851.97                 | 0.04        | $2.31 \times 10^{-25}$ | 152504.63                 | 150772.56                                   | -0.02       | $6.86 \times 10^{-05}$ | 131643.77 | 141335.70       | 0.10        | $1.97 \times 10^{-145}$ |

|                |          |          |       |                        |          |          |       |                        |          |          |       |                        |
|----------------|----------|----------|-------|------------------------|----------|----------|-------|------------------------|----------|----------|-------|------------------------|
| <i>HSP90B1</i> | 36665.95 | 38100.82 | 0.06  | $2.20 \times 10^{-12}$ | 45805.77 | 45019.36 | -0.02 | $1.15 \times 10^{-03}$ | 39232.32 | 42105.57 | 0.10  | $6.80 \times 10^{-43}$ |
| <i>HSPA1A</i>  | 1291.18  | 1519.73  | 0.24  | $1.41 \times 10^{-08}$ |          |          |       |                        | 1381.55  | 1777.93  | 0.36  | $8.12 \times 10^{-21}$ |
| <i>HSPA1L</i>  | 135.97   | 173.68   | 0.35  | $7.61 \times 10^{-03}$ |          |          |       |                        |          |          |       |                        |
| <i>MAN1A2</i>  | 6096.62  | 6826.11  | 0.16  | $4.92 \times 10^{-18}$ |          |          |       |                        | 6523.34  | 7281.65  | 0.16  | $8.48 \times 10^{-18}$ |
| <i>MAN1B1</i>  | 7198.77  | 7720.76  | 0.10  | $1.70 \times 10^{-08}$ | 9282.09  | 8797.90  | -0.08 | $3.89 \times 10^{-06}$ |          |          |       |                        |
| <i>MAN1C1</i>  | 107.23   | 73.27    | -0.55 | $1.26 \times 10^{-03}$ |          |          |       |                        | 114.74   | 66.79    | -0.78 | $3.95 \times 10^{-06}$ |
| <i>OS9</i>     | 5930.80  | 6637.05  | 0.16  | $2.08 \times 10^{-17}$ | 7979.22  | 7327.60  | -0.12 | $3.05 \times 10^{-12}$ |          |          |       |                        |
| <i>P4HB</i>    | 11873.76 | 11509.22 | -0.04 | $2.52 \times 10^{-03}$ |          |          |       |                        |          |          |       |                        |
| <i>PDIA6</i>   | 10631.23 | 9786.86  | -0.12 | $1.46 \times 10^{-15}$ |          |          |       |                        |          |          |       |                        |
| <i>PSMA5</i>   | 2508.29  | 2180.08  | -0.20 | $1.49 \times 10^{-10}$ |          |          |       |                        |          |          |       |                        |
| <i>PSMB2</i>   | 3642.50  | 3343.40  | -0.12 | $2.85 \times 10^{-06}$ |          |          |       |                        | 3897.45  | 3686.06  | -0.08 | $2.46 \times 10^{-03}$ |
| <i>PSMB3</i>   | 3379.40  | 3112.73  | -0.12 | $1.68 \times 10^{-05}$ |          |          |       |                        |          |          |       |                        |
| <i>PSMB4</i>   | 14460.54 | 13561.75 | -0.09 | $5.43 \times 10^{-13}$ | 16304.28 | 15663.91 | -0.06 | $4.45 \times 10^{-06}$ |          |          |       |                        |
| <i>PSMB5</i>   | 4152.11  | 3656.39  | -0.18 | $3.86 \times 10^{-14}$ | 4395.80  | 4832.96  | 0.14  | $2.98 \times 10^{-09}$ | 4442.73  | 4721.70  | 0.09  | $2.45 \times 10^{-04}$ |
| <i>PSMB6</i>   | 1235.91  | 1361.42  | 0.14  | $1.82 \times 10^{-03}$ | 1636.74  | 1820.64  | 0.15  | $7.90 \times 10^{-05}$ | 1322.41  | 1525.15  | 0.21  | $1.16 \times 10^{-06}$ |
| <i>PSMB7</i>   | 5494.14  | 4641.50  | -0.24 | $2.80 \times 10^{-31}$ |          |          |       |                        | 5878.70  | 5640.68  | -0.06 | $6.02 \times 10^{-03}$ |
| <i>RAD23A</i>  | 2654.21  | 2399.00  | -0.15 | $2.61 \times 10^{-06}$ | 2884.14  | 3061.98  | 0.09  | $4.40 \times 10^{-03}$ |          |          |       |                        |
| <i>RBX1</i>    | 1266.86  | 1113.56  | -0.19 | $4.67 \times 10^{-05}$ |          |          |       |                        |          |          |       |                        |
| <i>SEC61A1</i> |          |          |       |                        | 12847.02 | 12261.71 | -0.07 | $2.07 \times 10^{-06}$ | 11466.42 | 11852.87 | 0.05  | $1.62 \times 10^{-03}$ |
| <i>SEC61B</i>  | 1956.67  | 2121.29  | 0.12  | $1.06 \times 10^{-03}$ | 2550.26  | 2179.25  | -0.23 | $7.89 \times 10^{-13}$ |          |          |       |                        |
| <i>SELENOS</i> |          |          |       |                        | 1054.91  | 1186.17  | 0.17  | $5.35 \times 10^{-04}$ |          |          |       |                        |
| <i>SSR3</i>    |          |          |       |                        | 1028.81  | 1282.72  | 0.32  | $4.03 \times 10^{-12}$ | 1000.68  | 1130.33  | 0.18  | $4.44 \times 10^{-04}$ |
| <i>TRAM1</i>   |          |          |       |                        | 3012.46  | 3203.58  | 0.09  | $2.70 \times 10^{-03}$ | 2605.79  | 2860.07  | 0.13  | $1.21 \times 10^{-05}$ |
| <i>TXNDC5</i>  | 16.58    | 0.90     | -4.20 | $2.95 \times 10^{-04}$ | 1.09     | 10.11    | 3.22  | $8.52 \times 10^{-03}$ |          |          |       |                        |
| <i>UBE2G2</i>  | 2112.54  | 1959.36  | -0.11 | $2.31 \times 10^{-03}$ | 2355.59  | 2579.23  | 0.13  | $5.66 \times 10^{-05}$ |          |          |       |                        |
| <i>UBE2J1</i>  | 3562.90  | 3309.02  | -0.11 | $7.60 \times 10^{-05}$ | 3978.19  | 4300.56  | 0.11  | $6.06 \times 10^{-06}$ |          |          |       |                        |
| <i>UBQLN1</i>  | 7563.57  | 6966.32  | -0.12 | $3.39 \times 10^{-11}$ |          |          |       |                        | 8092.97  | 7629.97  | -0.08 | $1.92 \times 10^{-06}$ |
| <i>UBQLN2</i>  | 6254.70  | 5359.75  | -0.22 | $4.34 \times 10^{-30}$ |          |          |       |                        | 6692.49  | 5874.86  | -0.19 | $5.37 \times 10^{-23}$ |
| <i>UBQLN4</i>  | 3088.66  | 2724.65  | -0.18 | $1.79 \times 10^{-10}$ |          |          |       |                        | 3304.84  | 2804.28  | -0.24 | $6.67 \times 10^{-18}$ |
| <i>UBXN6</i>   | 3534.16  | 3274.65  | -0.11 | $4.66 \times 10^{-05}$ | 3936.87  | 4245.39  | 0.11  | $1.41 \times 10^{-05}$ | 3781.53  | 3995.48  | 0.08  | $2.60 \times 10^{-03}$ |
| <i>UBXN8</i>   | 762.77   | 638.65   | -0.26 | $1.57 \times 10^{-05}$ | 767.80   | 854.23   | 0.15  | $8.50 \times 10^{-03}$ |          |          |       |                        |

|             |          |          |       |                        |  |          |          |       |                        |
|-------------|----------|----------|-------|------------------------|--|----------|----------|-------|------------------------|
| <i>VCP</i>  | 23353.98 | 22050.52 | -0.08 | $1.34 \times 10^{-16}$ |  | 24988.60 | 25470.98 | 0.03  | $8.05 \times 10^{-03}$ |
| <i>WFS1</i> | 1678.09  | 1444.65  | -0.22 | $3.16 \times 10^{-08}$ |  |          |          |       |                        |
| <i>YOD1</i> | 517.36   | 442.35   | -0.23 | $2.07 \times 10^{-03}$ |  | 553.57   | 481.05   | -0.20 | $4.99 \times 10^{-03}$ |

The column Fold Change shows for each DEG the difference in the level of expression computed by  $\log_2(\text{A}\beta_{1-42}/\text{CTRL})$ ,  $\log_2(\Delta^8\text{-THC} + \text{A}\beta_{1-42}/\text{A}\beta_{1-42})$  or  $\log_2(\Delta^8\text{-THC}/\text{CTRL})$ . The *q*-Value column was obtained correcting the p-value through Benjamini–Hochberg correction. Blank cells are shown when gene q-value is higher than 0.01.
